# Supplementary material
Source: PubMed Central journal article supplement (PMC6295729)
Supplement: supp_RA118.005603_140435_1_supp_217516_pggs2s.pdf [file supp_RA118.005603_140435_1_supp_217516_pggs2s.pdf]

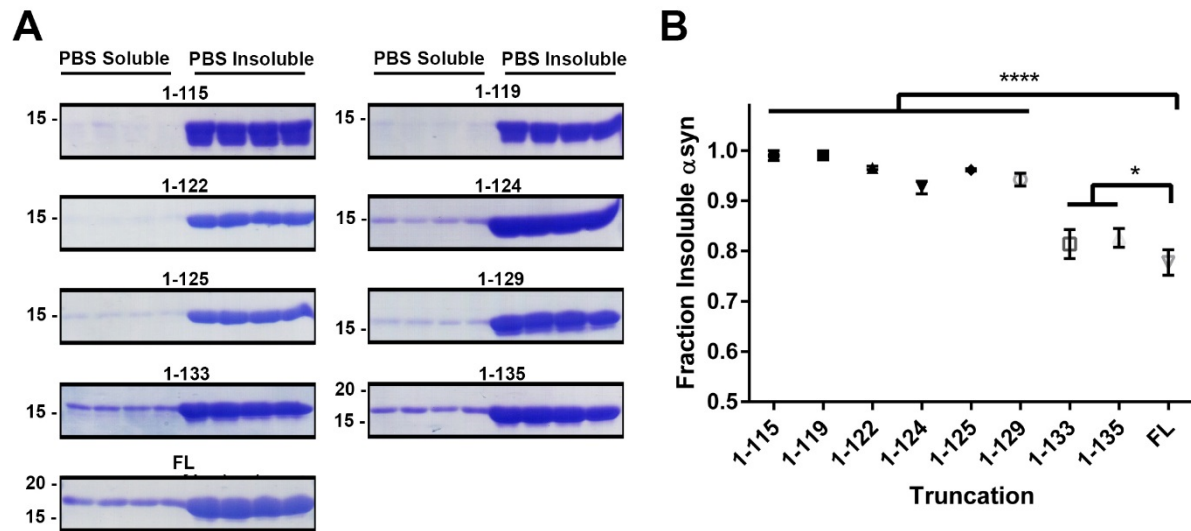

**Supplemental Figure 1. C-truncated  $\alpha$ syn aggregates extensively *in-vitro*.** (A) Coomassie stained SDS-PAGE gels showing the amount of soluble vs insoluble  $\alpha$ syn for each C-truncation of  $\alpha$ syn at the 96-hour time point of *in-vitro* incubation; C-truncated  $\alpha$ syn samples were prepared at 150  $\mu$ M (n=4). Mobilities of molecular mass markers in kDa are indicated. (B) Densitometric analysis of the gels in A; one-way ANOVA with Dunnet's test determined a large significant increase in the final extent of aggregation for truncations 1-129 and shorter at 96 hours. Error bars = std. \* =  $p \leq 0.05$ , \*\*\*\* =  $p \leq 0.0001$ .

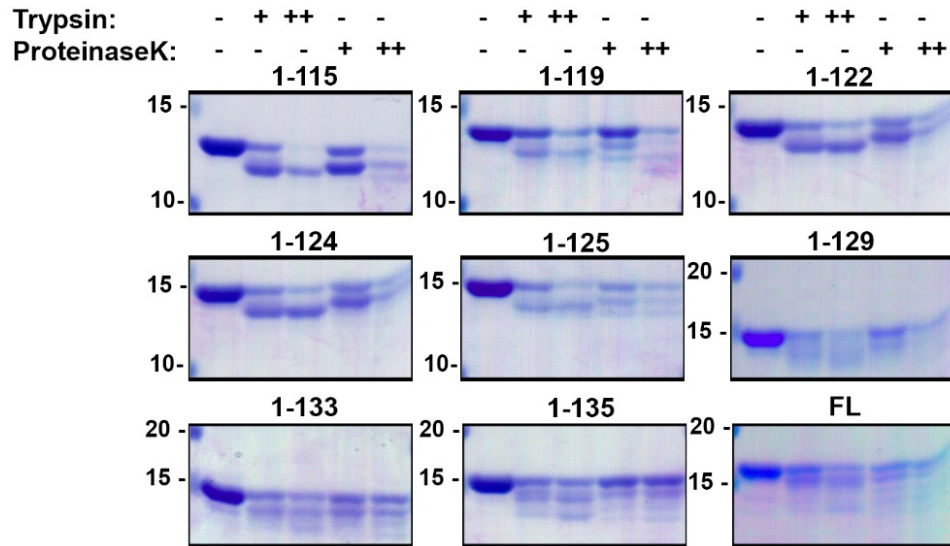

**Supplementary Figure 2. *In-vitro* proteolytic digestion profiles differ for fibrils comprised of different C-truncated forms of  $\alpha$ syn.** (A) Coomassie stained SDS-PAGE gels showing for each truncation the undigested  $\alpha$ syn fibrils along with equal amounts of digested fibrils (1 mg/mL) using either trypsin or proteinase K at two concentrations (0.05 mg/mL or 0.025 mg/mL for trypsin and 0.005 mg/mL or 0.0025 mg/mL for proteinase K) for 30 minutes at 37 °C. Digestion profiles differed between the shorter and longer C-truncated forms of  $\alpha$ syn as well as FL  $\alpha$ syn, indicating differences in  $\alpha$ syn fibril structure.

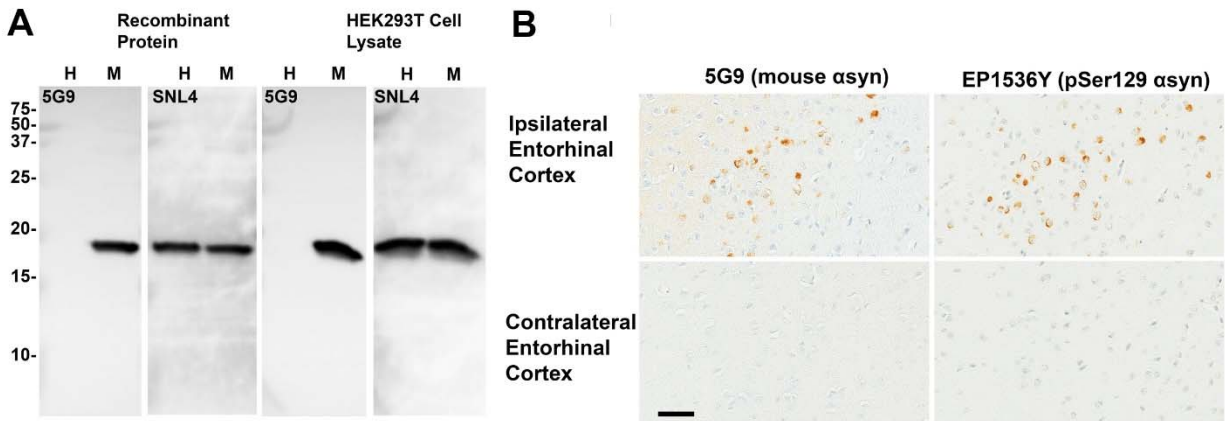

**Supplemental Figure 3. New 5G9 mouse monoclonal antibody is specific for mouse  $\alpha$ syn and preferentially binds aggregated  $\alpha$ syn.** (A) Western blots loaded with 200 ng of recombinant mouse (M) and human (H)  $\alpha$ syn, or 25  $\mu$ g of lysate from HEK293T cells transfected to expressed mouse or human  $\alpha$ syn. The 5G9 antibody detects only mouse  $\alpha$ syn and not human  $\alpha$ syn in both cases. (B) Immunohistochemical staining of a non-transgenic mouse induced to develop pathologic  $\alpha$ syn inclusions in the ipsilateral entorhinal cortex when intra-striatally injected with pre-formed mouse  $\alpha$ syn fibrils. The 5G9 antibody preferentially binds to mouse  $\alpha$ syn located within inclusions and not physiologic mouse  $\alpha$ syn as demonstrated by staining in the ipsilateral but not contralateral entorhinal cortex. The staining pattern of 5G9 paralleled that of antibody EP1536Y specific for pSer129 which is a marker of aggregated  $\alpha$ syn. Scale bar 50  $\mu$ m.

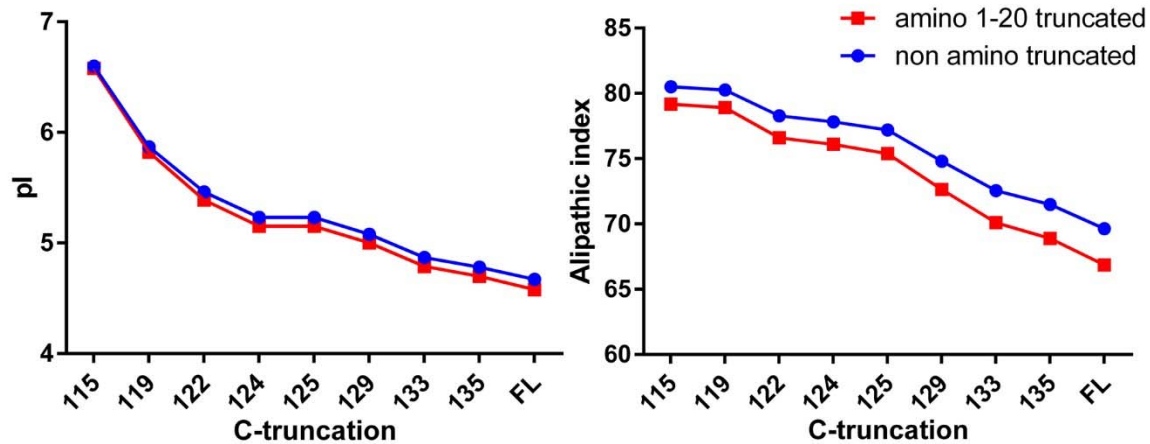

**Supplemental Figure 4. Predicted biochemical properties of C-truncated  $\alpha$ syn.** The theoretical Aliphatic index and protein isoelectric point of each carboxy-truncation and its 1-20 truncated counterpart. The biochemical properties of  $\alpha$ syn are dominated by carboxy and not amino truncation, as progressive C-truncation leads to a large increase in protein isoelectric point (pI) and related increase in aliphatic index due to loss of acidic residues.
